# Supplementary material for: Fibroblastic galectin-1-fostered invasion and metastasis are mediated by TGF-β1-induced epithelial-mesenchymal transition in gastric cancer
Source: publisher site journal article supplement (doi:10.18632/aging.203295), 2021-07-14
Supplement: Supplementary file [file aging-v13i14-203295-supplementary-material-SD1.pdf]

## SUPPLEMENTARY FIGURE

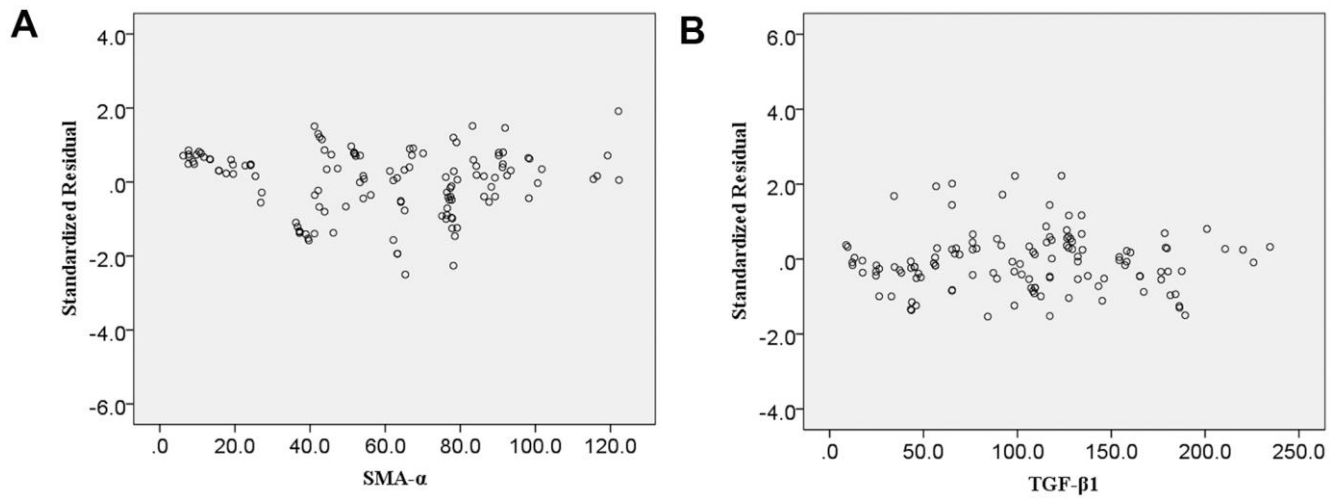

**Supplementary Figure 1. Residual analysis on IHC signal proteins showing that the IHC signal proteins in this study fitted the regression model hypothesis. (A) Residual analysis showed that GAL-1/SMA- $\alpha$  proteins fitted the regression model hypothesis. (B) Residual analysis showing that GAL-1/TGF- $\beta$ 1 proteins fitted the regression model hypothesis.**
